# Supplementary material
Source: publisher figshare collection journal article supplement (https://asha.figshare.com/articles/dataset/_/13641275)
Supplement: Supplementary file 1 [file 1]

**Supplemental Material S1.** Normality statistics for variables entered into the model.

|                                | Shapiro-Wilk's Test |                |                      | Kolmogorov-Smirnov's Test |                |                      |
|--------------------------------|---------------------|----------------|----------------------|---------------------------|----------------|----------------------|
|                                | Statistic           | <i>p</i> value | Univariate Normality | Statistic                 | <i>p</i> value | Univariate Normality |
| Perceptual bias                | .97                 | .03*           | No                   | .065                      | .30            | Yes                  |
| Age-adjusted perceptual acuity | .97                 | .01*           | No                   | .080                      | .08            | Yes                  |
| Phonological awareness         | .98                 | .23            | Yes                  | .07                       | .19            | Yes                  |
| Vocabulary                     | .98                 | .18            | Yes                  | .07                       | .16            | Yes                  |

*Note:* Significance at  $p < .05$  is indicated by the (\*) symbol.
