# Supplementary material
Source: publisher figshare collection journal article supplement (https://asha.figshare.com/articles/dataset/_/13641275)
Supplement: Supplementary file 2 [file 1]

**Supplemental Material S2.** Parameter estimates generated by the model and empirical power analysis.

| Independent Variable                                             | Mediator   | Dependent Variable     | Direct Effect ( <i>SE</i> ) | Indirect Effect ( <i>SE</i> ) | Total Effect ( <i>SE</i> ) | Rate of Significance (Power) in Monte Carlo Simulations |
|------------------------------------------------------------------|------------|------------------------|-----------------------------|-------------------------------|----------------------------|---------------------------------------------------------|
| Perceptual Bias                                                  | --         | Vocabulary             | .11 (.09)                   | --                            | --                         | .23                                                     |
| Age-Adjusted Perceptual Acuity                                   | --         | Vocabulary             | .09 (.09)                   | --                            | --                         | .17                                                     |
| Perceptual Bias                                                  | Vocabulary | Phonological Awareness | -.10 (.08)                  | .03 (.03)                     | -.07 (.08)                 | .23                                                     |
| Age-Adjusted Perceptual Acuity                                   | Vocabulary | Phonological Awareness | .29 (.10)**                 | .03 (.03)                     | .31 (.11)**                | .90                                                     |
| Vocabulary                                                       | --         | Phonological Awareness | .30 (.08)***                | --                            | --                         | .92                                                     |
| Age-adjusted Perceptual Acuity with Perceptual Bias (covariance) |            |                        | .06 (.08)                   |                               |                            | .10                                                     |

*Note:* Standardized estimates are provided. Monte Carlo simulation results show the percent of 10,000 simulations with significant coefficients for the direct path ( $\alpha = .05$ ). When the direct path is hypothesized to be significant this value is equivalent to achieved power at the given sample size, and when the direct path is hypothesized to be not significant this value is equivalent to the Type I error rate. *SE* = standard error. Values marked with (\*) are significant at  $\alpha = .05$ , values marked with (\*\*) are significant at  $\alpha = .01$ , and values marked with (\*\*\*) are significant at  $\alpha = .001$ .
